# Supplementary material for: Functional and Phenotypic Characterisations of Common Syngeneic Tumour Cell Lines as Estrogen Receptor-Positive Breast Cancer Models
Source: MDPI journal article supplement (doi:10.3390/ijms24065666), 2023-03-16
Supplement: s1 [file s1]

**Supplementary Table S1: Pathological assessment of syngeneic tumours**

| <i>Tumour</i> | <i>Pathology</i>          | <i>Background strain</i> |
|---------------|---------------------------|--------------------------|
| SSM3          | Adenocarcinoma            | 129/SvEv                 |
| E0771         | Anaplastic Carcinosarcoma | C57Bl/6                  |
| 4T1.2         | Sarcoma                   | Balb/C                   |
| D2.OR         | Carcinosarcoma            | Balb/C                   |
| 67NR          | Sarcoma                   | Balb/C                   |
| J110          | Sarcoma                   | FVB/N                    |
| D2A1          | Carcinosarcoma            | Balb/C                   |

**Supplementary Figure S1: FACS gating strategy**

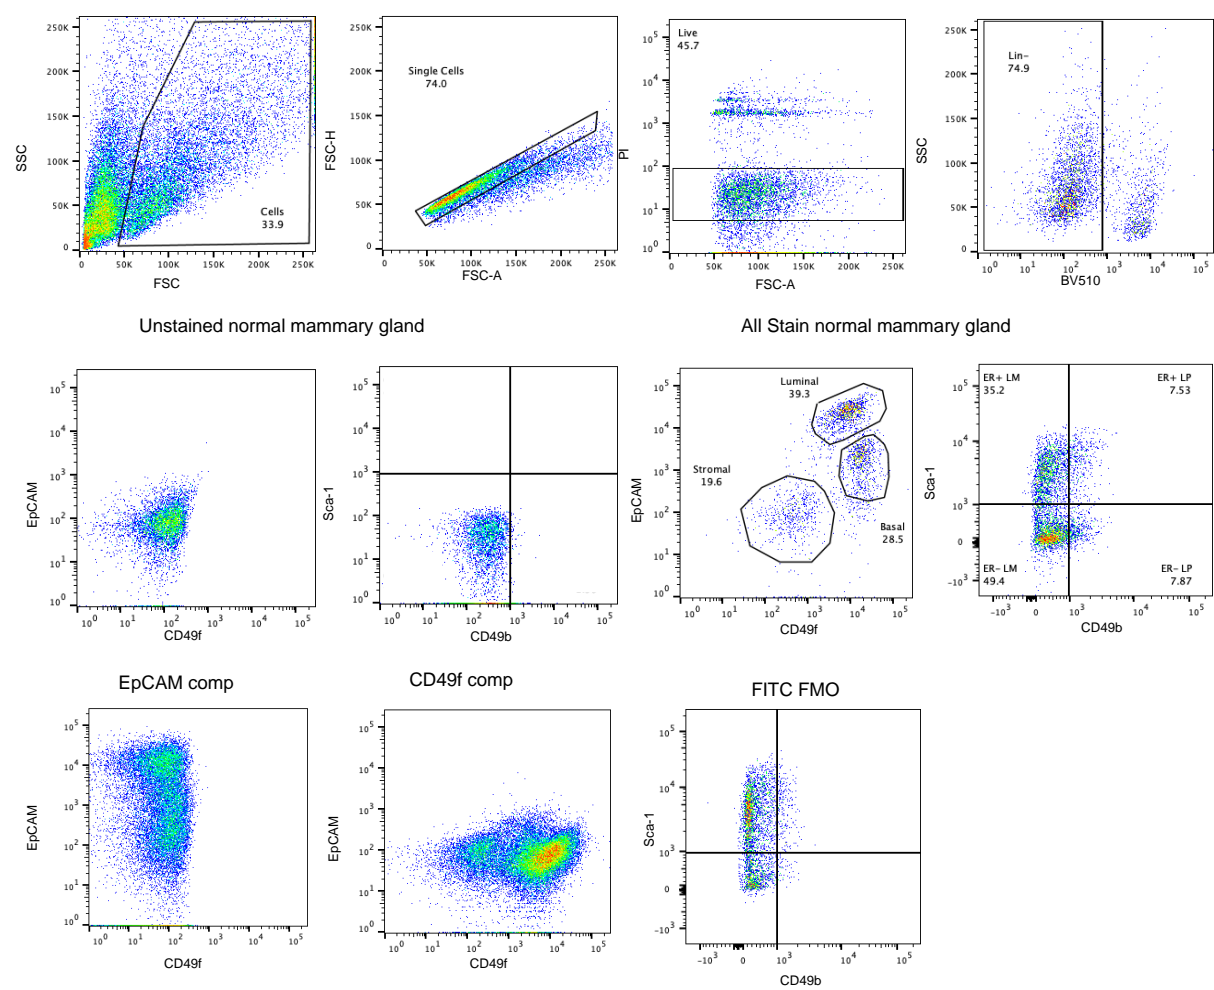

**Supplementary Figure S1:** Representative plots of the FACS gating strategy. After gating for our cells (FSC vs SSC), singlets (FSC-A vs FSC-H), live cells (propidium iodide) and excluding lineage cells (Ter119, CD31, CD45) we are then able to delineate our epithelial gates using a combination of unstained controls, comp controls and FMOs.

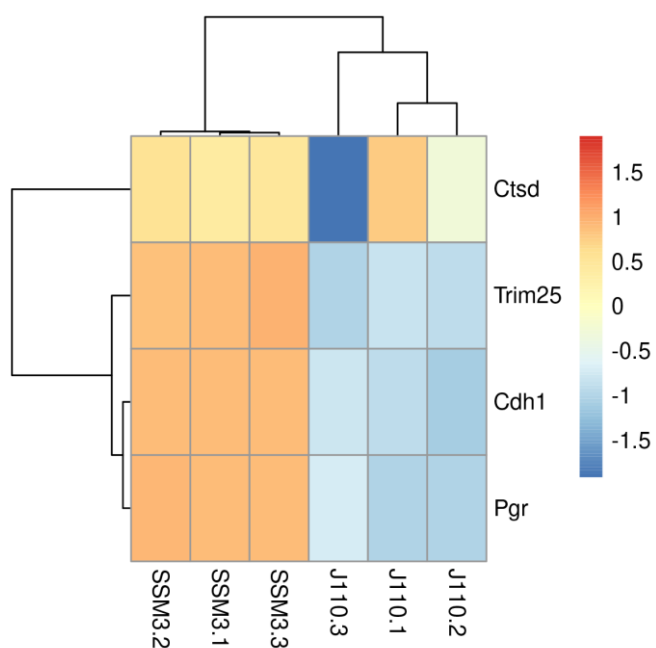

**Supplementary Figure S2:** Heatmap of genes induced by estrogen in MCF7 cells when assessed in SSM3 and J110 gene expression data. Scale shows increased relative expression in red and decreased expression in blue.
